# Supplementary material for: Effects of Aedes aegypti salivary components on dendritic cell and lymphocyte biology
Source: PubMed Central journal article supplement (PMC3843549; doi:10.1186/1756-3305-6-329), 2013-11-15
Supplement: 1756-3305-6-329-S1.pdf [file 1756-3305-6-329-S1.pdf]

# Additional file 1

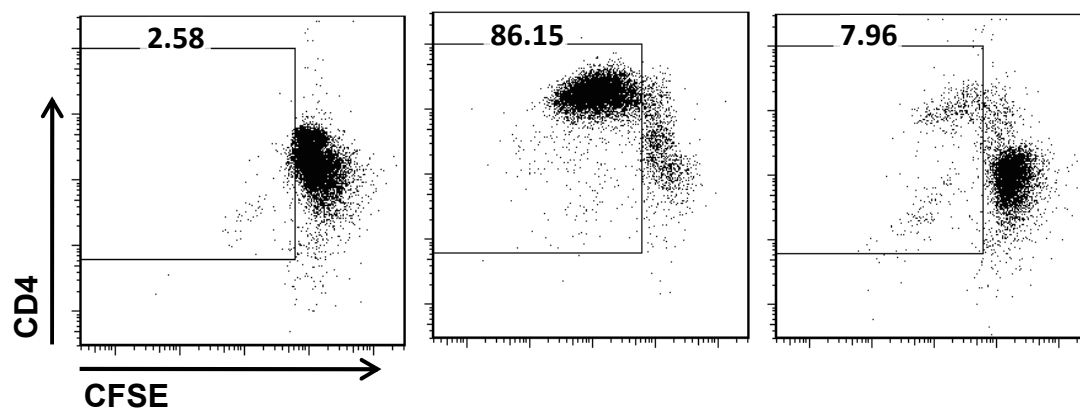

|                               |   |   |   |
|-------------------------------|---|---|---|
| SGE (40 $\mu\text{g/mL}$ )    | - | - | + |
| Con A (0.5 $\mu\text{g/mL}$ ) | - | + | + |
