# Supplementary material for: Effects of Aedes aegypti salivary components on dendritic cell and lymphocyte biology
Source: PubMed Central journal article supplement (PMC3843549; doi:10.1186/1756-3305-6-329), 2013-11-15

# Additional file 2

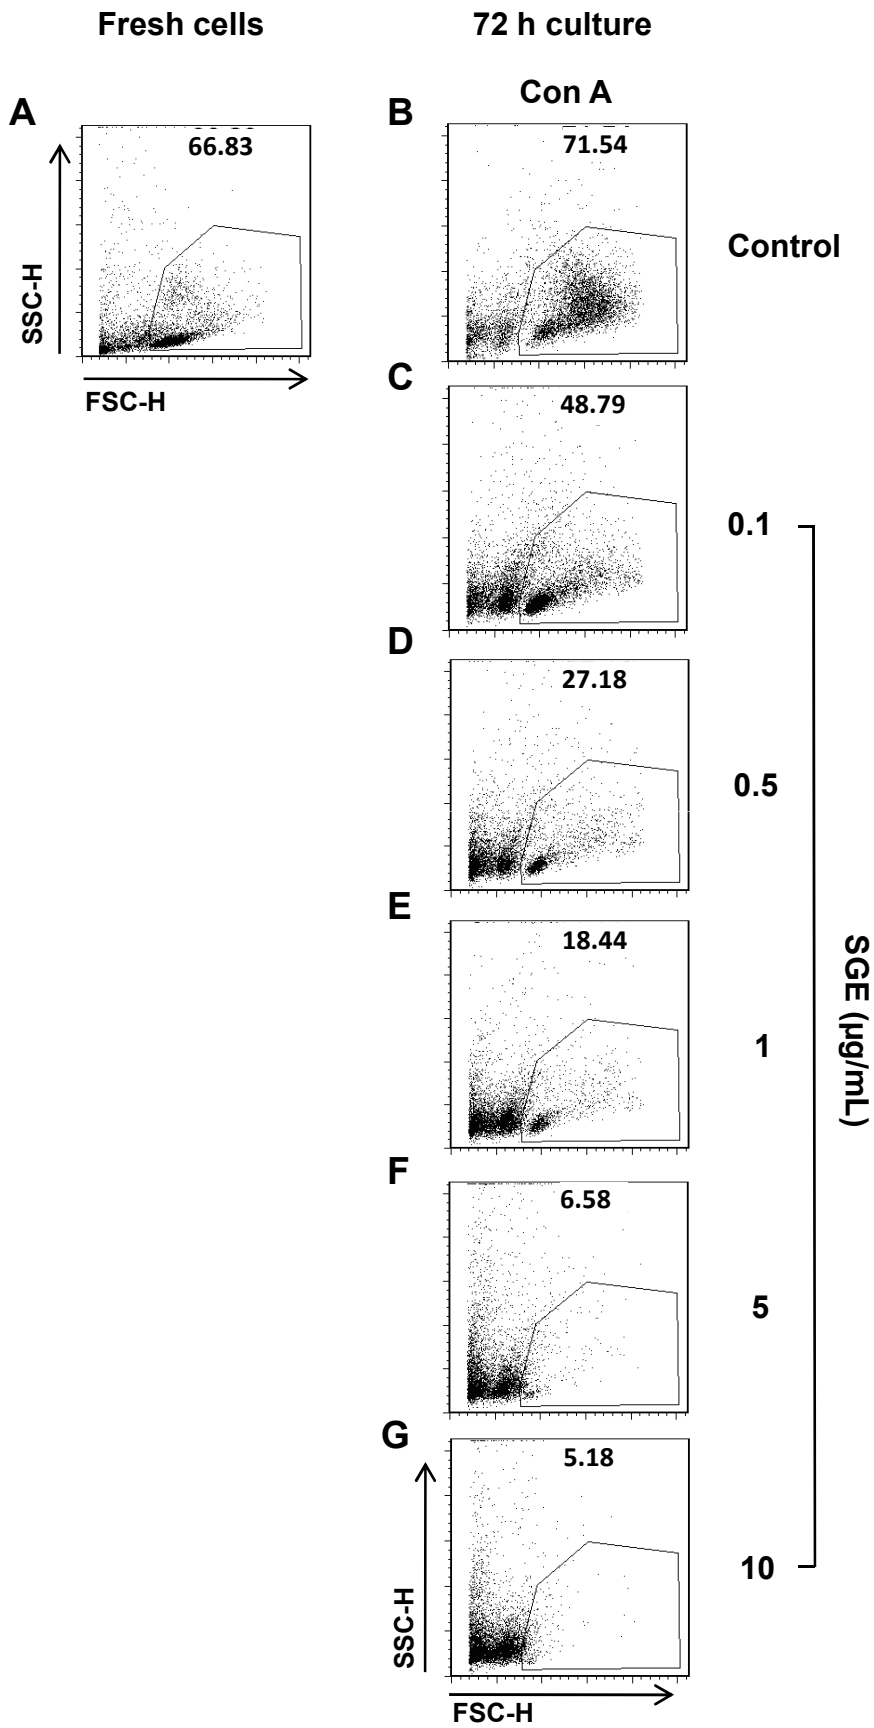

Supplement: 1756-3305-6-329-S2.pdf [file 1756-3305-6-329-S2.pdf]
